# Supplementary material for: Île Dumet (Armorican Massif, France) and its glaucophane eclogites: the little sister of Île de Groix
Source: Copernicus journal article supplement (doi:10.5194/ejm-36-99-2024), 2024-01-19
Supplement: Supplementary file 1 [file ejm-36-99-2024-supplement.pdf]

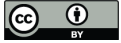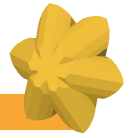

*Supplement of*

**Île Dumet (Armorican Massif, France) and its glaucophane eclogites:  
the little sister of Île de Groix**

**Gaston Godard et al.**

*Correspondence to:* Gaston Godard (godard@ipgp.fr)

The copyright of individual parts of the supplement might differ from the article licence.

## **Supplementary material**

Figure S1: Representative thin section images of the various rock types, showing their texture and mineralogy

Figure S2: Orthogneiss interlayered with micaschists, at Les Sables Rouges, on the east coast of the island of Groix

Table S1: Garnet compositions

Table S2: Omphacite compositions

Figure S1: Representative thin section images of the various rock types showing their texture and mineralogy  
Plane-polarised light (left) and cross-polarised light (right); see Figure 4 and text for the details.

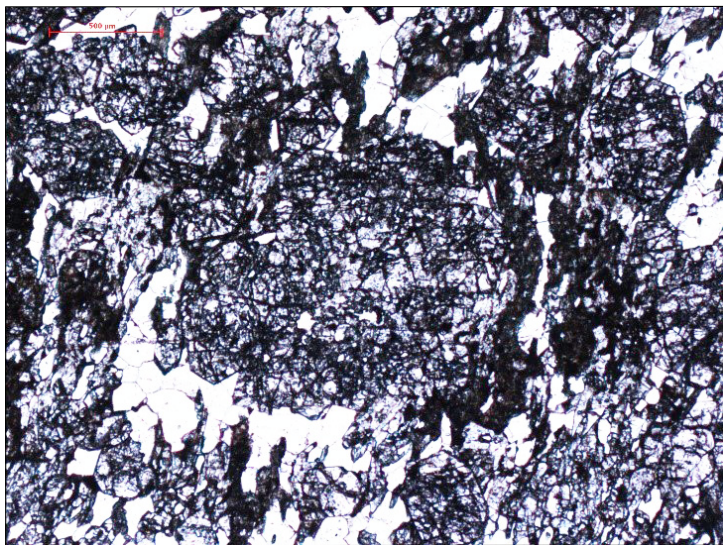

**a**

sample  
ID25a

500  $\mu$ m

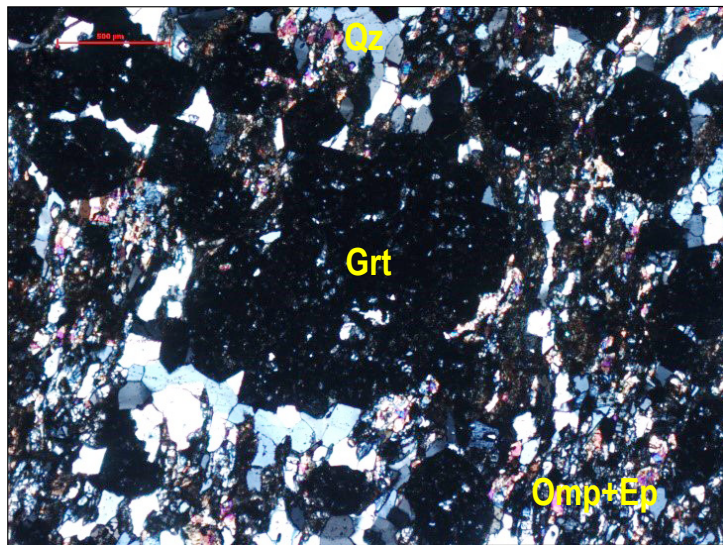

a: Eclogite band with abundant subhedral garnets containing microinclusions, surrounded by a foliated matrix of omphacite, epidote and quartz, with rare amphibole and rutile.

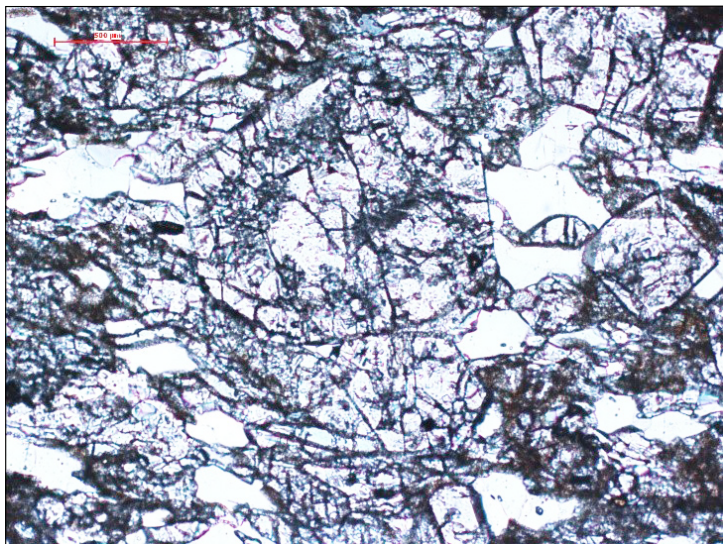

**b**

sample  
ID25b

500  $\mu$ m

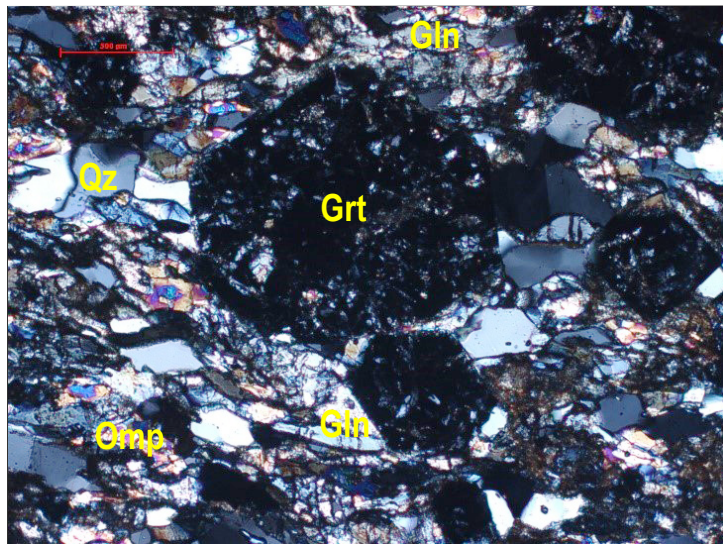

b: Garnet glaucophanite band with abundant euhedral garnets full of microinclusions, surrounded by a foliated matrix of glaucophane, quartz, minor omphacite, paragonite and rutile.

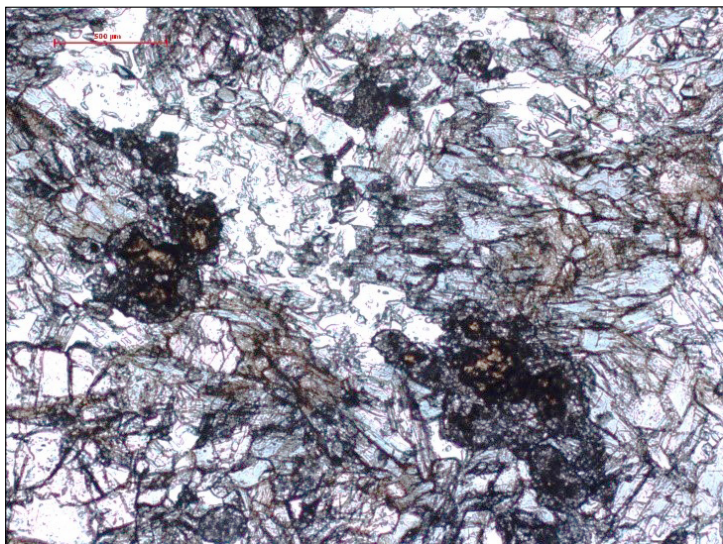

**c**

sample  
ID16

500  $\mu$ m

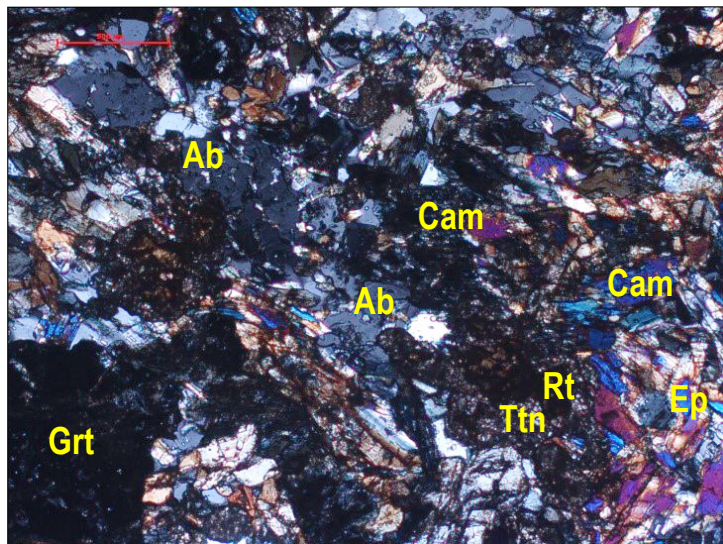

c: Amphibolite (i.e., retrogressed eclogite) with a typical symplectitic matrix of clinoamphibole and albitic plagioclase with epidote; garnet survives in part (e.g., lower left) but not omphacite; relict rutile is enveloped by titanite; relict quartz is rare.

Figure S1: Representative thin section images of the various rock types (continued).

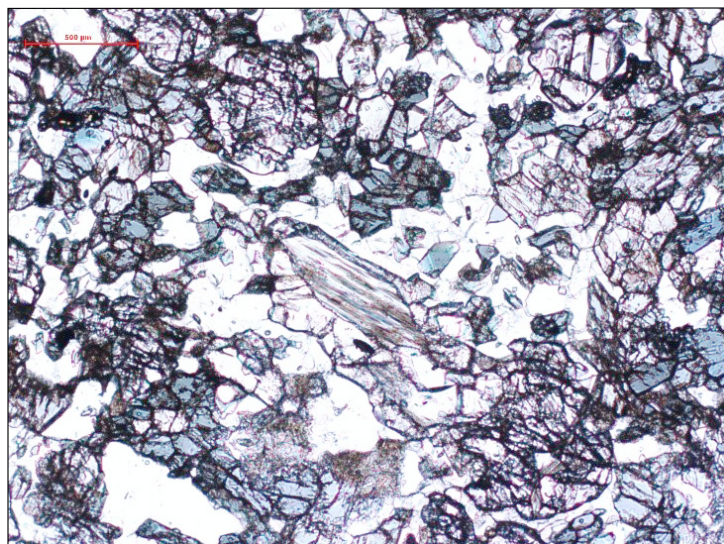

**d**

sample  
ID33

500 µm

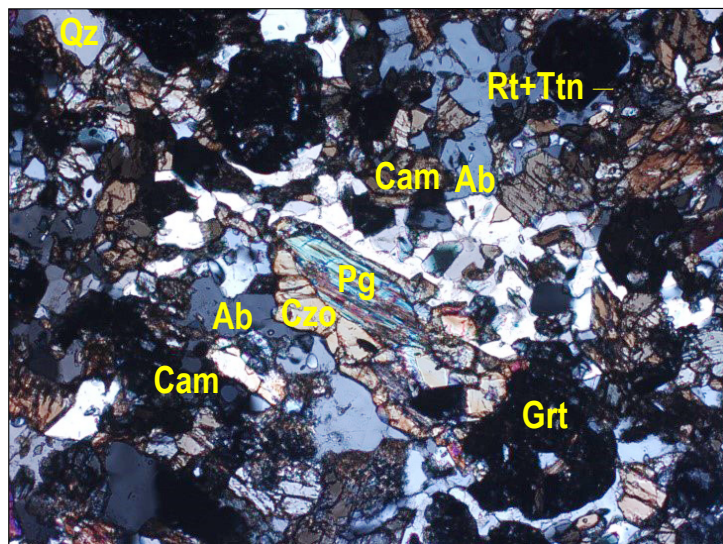

d: Amphibolite (i.e., retrogressed eclogite) showing a typical symplectitic matrix of clinoamphibole and albitic plagioclase together with relict quartz; clinozoisite occurs particularly around micas (centre), where paragonite contains small lamellae of exsolved phengite; garnet survives in places (e.g., bottom right), but not omphacite.

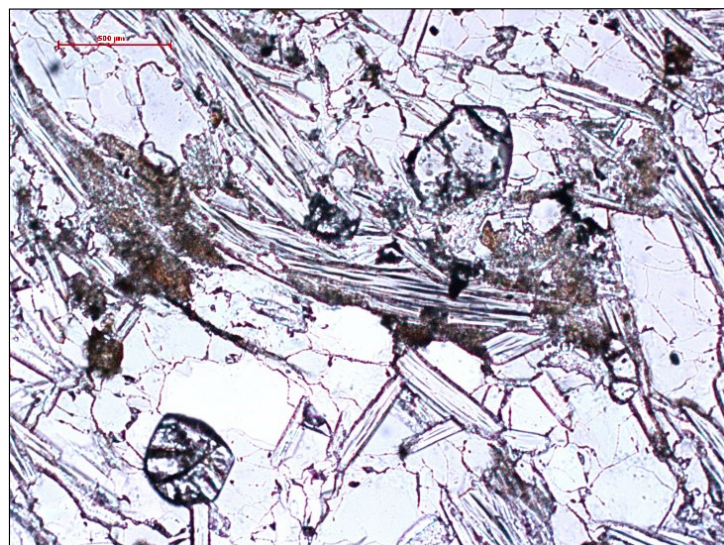

**e**

sample  
ID13

500 µm

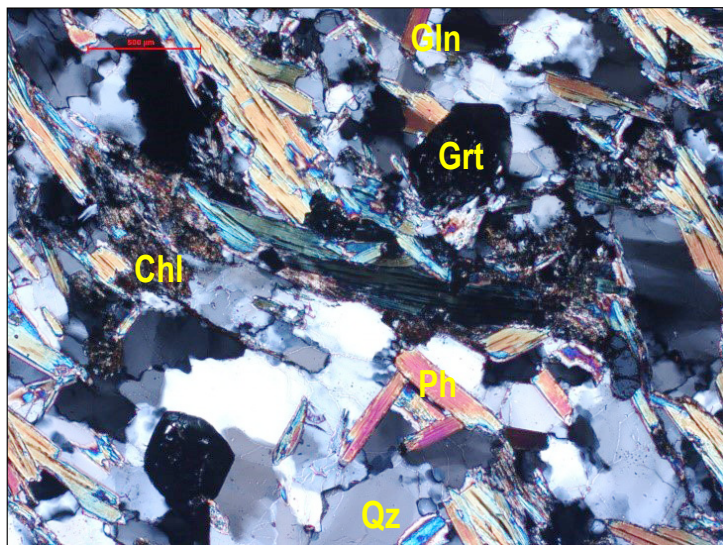

e: Micaschist with isolated euhedral garnets, laths of phengite, clusters of chlorite and small grains of rutile enveloped in later titanite and clinozoisite, in a matrix of quartz with minor albite.

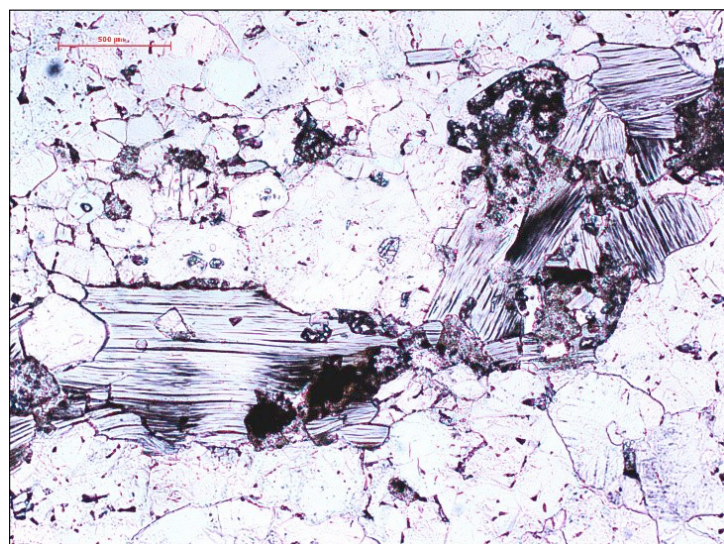

**f**

sample  
ID17

500 µm

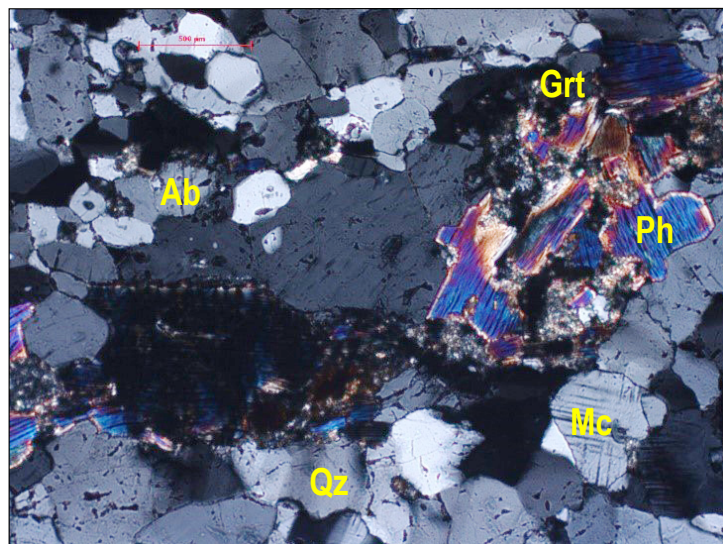

f: Orthogneiss (i.e., leucocratic metagranitoid) showing a dominant quartzofeldspathic matrix (with microcline, albite and quartz) interspersed by laths of phengite and clusters of Fe-oxides and garnet; biotite, chlorite, apatite, monazite and zircon may also occur.

Figure S2: Orthogneiss interlayered with micaschists, at Les Sables Rouges, on the east coast of the island of Groix (to compare with Fig. 3b).

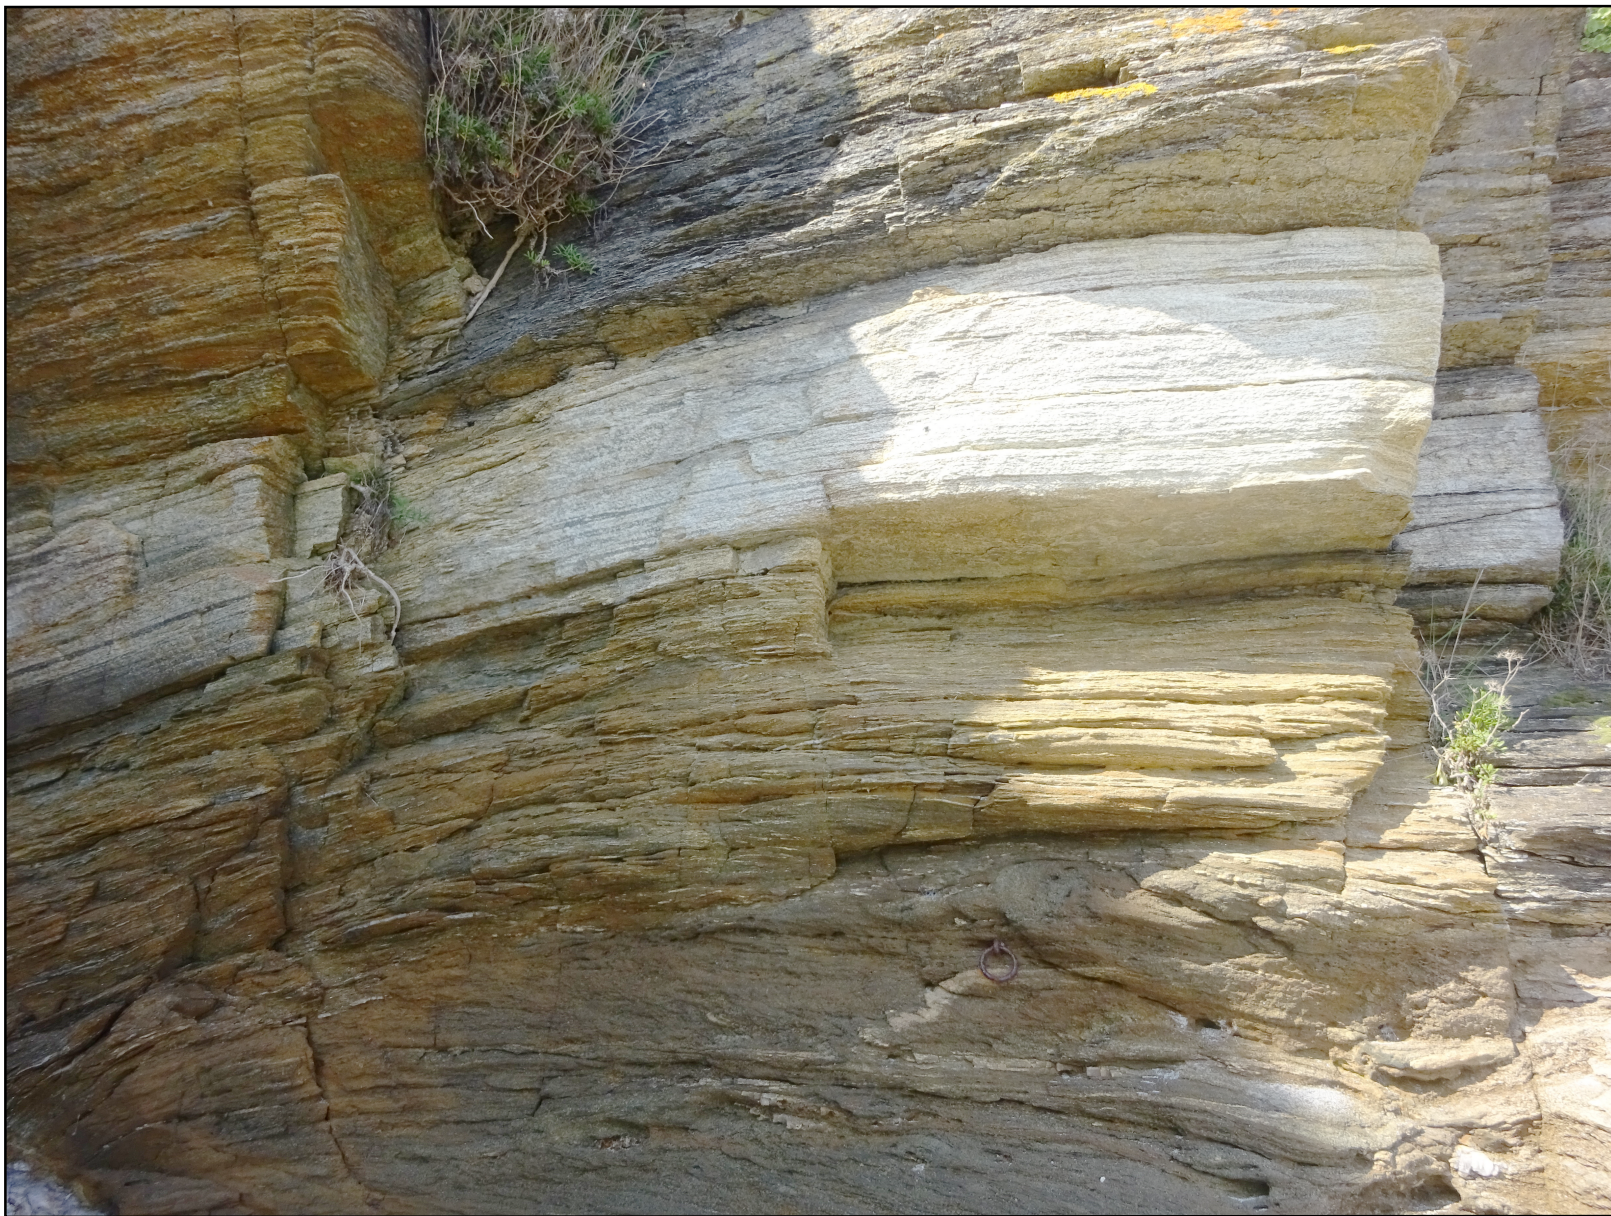

| Sample                           | ID1 (glaucophane eclogite) |        | ID9 (glaucophane eclogite) |        | ID16 (amphibolitised eclogite) |        | ID25a (eclogite layer) |        | ID25b (glaucophanite layer) |        | ID33 (amphibolitised eclogite) |        |             |        |            |        |        |        |        |        |        |        |        |        |
|----------------------------------|----------------------------|--------|----------------------------|--------|--------------------------------|--------|------------------------|--------|-----------------------------|--------|--------------------------------|--------|-------------|--------|------------|--------|--------|--------|--------|--------|--------|--------|--------|--------|
|                                  | Garnet core                |        | Garnet rim                 |        | Garnet core                    |        | Garnet rim             |        | Garnet core                 |        | Garnet rim                     |        | Garnet core |        | Garnet rim |        |        |        |        |        |        |        |        |        |
| Weight%                          | av(4)                      | ±1σ    | av(7)                      | ±1σ    | av(3)                          | ±1σ    | av(5)                  | ±1σ    | av(15)                      | ±1σ    | av(13)                         | ±1σ    | av(7)       | ±1σ    | av(4)      | ±1σ    | av(3)  | ±1σ    | av(6)  | ±1σ    | av(3)  | ±1σ    | av(8)  | ±1σ    |
| SiO <sub>2</sub>                 | 37.15                      | 0.138  | 37.62                      | 0.433  | 37.23                          | 0.418  | 37.52                  | 0.200  | 36.93                       | 0.529  | 37.61                          | 0.409  | 37.71       | 0.295  | 38.33      | 0.413  | 37.22  | 0.123  | 37.38  | 0.278  | 37.86  | 0.342  | 37.30  | 0.365  |
| TiO <sub>2</sub>                 | 0.27                       | 0.012  | 0.14                       | 0.031  | 0.15                           | 0.102  | 0.10                   | 0.059  | 0.12                        | 0.054  | 0.10                           | 0.040  | 0.14        | 0.036  | 0.08       | 0.022  | 0.15   | 0.023  | 0.16   | 0.045  | 0.11   | 0.032  | 0.09   | 0.032  |
| Al <sub>2</sub> O <sub>3</sub>   | 21.16                      | 0.052  | 21.43                      | 0.247  | 20.93                          | 0.099  | 21.00                  | 1.078  | 21.57                       | 0.423  | 21.80                          | 0.200  | 21.31       | 0.184  | 21.79      | 0.337  | 20.97  | 0.376  | 21.27  | 0.248  | 21.49  | 0.049  | 21.39  | 0.221  |
| Cr <sub>2</sub> O <sub>3</sub>   | 0.01                       | 0.007  | 0.01                       | 0.005  | 0.00                           | 0.000  | 0.00                   | 0.000  | 0.00                        | 0.005  | 0.01                           | 0.011  | 0.01        | 0.019  | 0.03       | 0.032  | 0.02   | 0.024  | 0.02   | 0.018  | 0.05   | 0.059  | 0.03   | 0.028  |
| Fe <sub>2</sub> O <sub>3</sub> * | 0.00                       | 0.000  | 0.00                       | 0.071  | 0.29                           | 0.190  | 0.43                   | 0.207  | 0.00                        | 0.000  | 0.00                           | 0.000  | 0.08        | 0.187  | 0.00       | 0.012  | 0.30   | 0.307  | 0.00   | 0.171  | 0.00   | 0.000  | 0.00   | 0.030  |
| FeO                              | 23.75                      | 0.400  | 29.47                      | 0.322  | 24.27                          | 0.717  | 30.15                  | 0.664  | 23.28                       | 0.548  | 27.32                          | 0.678  | 21.01       | 0.814  | 27.02      | 0.556  | 24.34  | 0.469  | 28.70  | 0.474  | 28.01  | 0.326  | 30.70  | 1.073  |
| MnO                              | 7.44                       | 0.424  | 0.32                       | 0.045  | 5.86                           | 0.744  | 0.39                   | 0.102  | 6.44                        | 0.161  | 0.61                           | 0.101  | 8.43        | 0.934  | 0.37       | 0.054  | 4.62   | 0.815  | 0.66   | 0.295  | 2.50   | 0.434  | 0.46   | 0.087  |
| MgO                              | 0.92                       | 0.021  | 1.87                       | 0.154  | 0.59                           | 0.089  | 1.96                   | 0.272  | 0.86                        | 0.118  | 2.36                           | 0.158  | 0.42        | 0.198  | 2.70       | 0.421  | 1.20   | 0.140  | 1.46   | 0.285  | 1.26   | 0.077  | 1.76   | 0.296  |
| CaO                              | 10.05                      | 0.132  | 10.33                      | 0.238  | 11.09                          | 1.026  | 9.10                   | 0.245  | 11.08                       | 0.568  | 11.04                          | 0.432  | 11.62       | 0.710  | 10.49      | 0.308  | 11.51  | 0.323  | 11.04  | 0.440  | 9.47   | 0.278  | 8.59   | 0.522  |
| Na <sub>2</sub> O                | 0.01                       | 0.006  | 0.01                       | 0.005  | 0.04                           | 0.011  | 0.05                   | 0.050  | 0.02                        | 0.015  | 0.02                           | 0.017  | 0.02        | 0.016  | 0.01       | 0.017  | 0.01   | 0.008  | 0.02   | 0.016  | 0.01   | 0.007  | 0.02   | 0.018  |
| K <sub>2</sub> O                 | 0.00                       | 0.003  | 0.00                       | 0.003  | 0.00                           | 0.005  | 0.01                   | 0.014  | 0.00                        | 0.002  | 0.00                           | 0.004  | 0.01        | 0.016  | 0.01       | 0.015  | 0.01   | 0.016  | 0.01   | 0.012  | 0.01   | 0.009  | 0.00   | 0.002  |
| Total                            | 100.77                     | 0.353  | 101.19                     | 0.685  | 100.45                         | 0.719  | 100.70                 | 0.438  | 100.29                      | 0.860  | 100.86                         | 0.506  | 100.76      | 0.794  | 100.83     | 1.125  | 100.34 | 0.383  | 100.71 | 0.679  | 100.76 | 0.090  | 100.33 | 1.127  |
| Si                               | 2.963                      | 0.0018 | 2.968                      | 0.0115 | 2.979                          | 0.0100 | 2.983                  | 0.0252 | 2.949                       | 0.0122 | 2.957                          | 0.0109 | 2.993       | 0.0098 | 2.996      | 0.0042 | 2.970  | 0.0073 | 2.966  | 0.0113 | 2.999  | 0.0191 | 2.975  | 0.0143 |
| Al                               | 1.989                      | 0.0031 | 1.993                      | 0.0072 | 1.974                          | 0.0063 | 1.968                  | 0.0855 | 2.030                       | 0.0212 | 2.020                          | 0.0092 | 1.994       | 0.0182 | 2.007      | 0.0091 | 1.972  | 0.0239 | 1.989  | 0.0150 | 2.006  | 0.0083 | 2.010  | 0.0155 |
| Ti                               | 0.016                      | 0.0008 | 0.008                      | 0.0018 | 0.009                          | 0.0062 | 0.006                  | 0.0035 | 0.007                       | 0.0032 | 0.006                          | 0.0024 | 0.008       | 0.0022 | 0.005      | 0.0013 | 0.009  | 0.0014 | 0.009  | 0.0027 | 0.006  | 0.0019 | 0.005  | 0.0019 |
| Cr                               | 0.001                      | 0.0005 | 0.001                      | 0.0003 | 0.000                          | 0.0000 | 0.000                  | 0.0000 | 0.000                       | 0.0003 | 0.001                          | 0.0007 | 0.001       | 0.0012 | 0.002      | 0.0020 | 0.001  | 0.0015 | 0.001  | 0.0012 | 0.003  | 0.0037 | 0.002  | 0.0018 |
| Fe <sup>3+</sup> *               | 0.000                      | 0.0000 | 0.000                      | 0.0042 | 0.018                          | 0.0114 | 0.026                  | 0.0124 | 0.000                       | 0.0000 | 0.000                          | 0.0000 | 0.000       | 0.0111 | 0.000      | 0.0007 | 0.018  | 0.0185 | 0.000  | 0.0102 | 0.000  | 0.0000 | 0.000  | 0.0018 |
| Fe <sup>2+</sup>                 | 1.584                      | 0.0251 | 1.944                      | 0.0227 | 1.624                          | 0.0472 | 2.005                  | 0.0542 | 1.555                       | 0.0410 | 1.796                          | 0.0547 | 1.400       | 0.0577 | 1.766      | 0.0325 | 1.624  | 0.0377 | 1.905  | 0.0218 | 1.855  | 0.0263 | 2.047  | 0.0708 |
| Mg                               | 0.110                      | 0.0024 | 0.220                      | 0.0164 | 0.071                          | 0.0104 | 0.232                  | 0.0327 | 0.102                       | 0.0144 | 0.276                          | 0.0180 | 0.050       | 0.0235 | 0.315      | 0.0478 | 0.142  | 0.0158 | 0.173  | 0.0332 | 0.149  | 0.0088 | 0.210  | 0.0341 |
| Mn <sup>2+</sup>                 | 0.502                      | 0.0286 | 0.021                      | 0.0028 | 0.397                          | 0.0525 | 0.026                  | 0.0068 | 0.436                       | 0.0117 | 0.041                          | 0.0067 | 0.566       | 0.0603 | 0.025      | 0.0036 | 0.312  | 0.0535 | 0.044  | 0.0200 | 0.168  | 0.0288 | 0.031  | 0.0058 |
| Ca                               | 0.859                      | 0.0113 | 0.873                      | 0.0271 | 0.951                          | 0.0853 | 0.775                  | 0.0233 | 0.948                       | 0.0495 | 0.930                          | 0.0312 | 0.988       | 0.0606 | 0.879      | 0.0289 | 0.984  | 0.0326 | 0.938  | 0.0393 | 0.804  | 0.0256 | 0.734  | 0.0412 |
| Na                               | 0.002                      | 0.0009 | 0.001                      | 0.0008 | 0.007                          | 0.0017 | 0.008                  | 0.0075 | 0.002                       | 0.0023 | 0.002                          | 0.0025 | 0.003       | 0.0025 | 0.002      | 0.0025 | 0.001  | 0.0012 | 0.003  | 0.0025 | 0.001  | 0.0012 | 0.003  | 0.0028 |
| K                                | 0.000                      | 0.0003 | 0.000                      | 0.0003 | 0.000                          | 0.0005 | 0.001                  | 0.0014 | 0.000                       | 0.0002 | 0.000                          | 0.0004 | 0.001       | 0.0016 | 0.001      | 0.0015 | 0.001  | 0.0016 | 0.001  | 0.0012 | 0.001  | 0.0009 | 0.000  | 0.0002 |
| X <sub>Alm</sub>                 | 0.519                      | 0.0074 | 0.636                      | 0.0037 | 0.534                          | 0.0166 | 0.660                  | 0.0067 | 0.511                       | 0.0115 | 0.590                          | 0.0154 | 0.466       | 0.0174 | 0.592      | 0.0100 | 0.530  | 0.0119 | 0.622  | 0.0080 | 0.624  | 0.0059 | 0.678  | 0.0229 |
| X <sub>Sps</sub>                 | 0.164                      | 0.0096 | 0.007                      | 0.0010 | 0.130                          | 0.0171 | 0.009                  | 0.0024 | 0.143                       | 0.0033 | 0.013                          | 0.0022 | 0.189       | 0.0198 | 0.008      | 0.0012 | 0.102  | 0.0176 | 0.015  | 0.0065 | 0.056  | 0.0099 | 0.010  | 0.0019 |
| X <sub>Grs</sub>                 | 0.281                      | 0.0037 | 0.285                      | 0.0063 | 0.304                          | 0.0248 | 0.242                  | 0.0128 | 0.312                       | 0.0163 | 0.305                          | 0.0115 | 0.329       | 0.0240 | 0.294      | 0.0103 | 0.312  | 0.0047 | 0.306  | 0.0121 | 0.269  | 0.0060 | 0.242  | 0.0132 |
| X <sub>Prp</sub>                 | 0.036                      | 0.0008 | 0.072                      | 0.0058 | 0.023                          | 0.0034 | 0.076                  | 0.0096 | 0.034                       | 0.0046 | 0.091                          | 0.0059 | 0.017       | 0.0078 | 0.106      | 0.0158 | 0.046  | 0.0052 | 0.057  | 0.0110 | 0.050  | 0.0032 | 0.069  | 0.0109 |
| X <sub>Uv</sub>                  | 0.000                      | 0.0002 | 0.000                      | 0.0002 | 0.000                          | 0.0000 | 0.000                  | 0.0000 | 0.000                       | 0.0002 | 0.000                          | 0.0003 | 0.000       | 0.0006 | 0.001      | 0.0010 | 0.001  | 0.0008 | 0.000  | 0.0006 | 0.002  | 0.0018 | 0.001  | 0.0009 |
| X <sub>Adr</sub>                 | 0.000                      | 0.0000 | 0.000                      | 0.0021 | 0.009                          | 0.0057 | 0.013                  | 0.0062 | 0.000                       | 0.0000 | 0.000                          | 0.0000 | 0.000       | 0.0056 | 0.000      | 0.0003 | 0.009  | 0.0093 | 0.000  | 0.0051 | 0.000  | 0.0000 | 0.000  | 0.0009 |

**Table S1- Garnet compositions**

av(*n*): average of *n* EMP analyses; σ: standard deviation; \*: calculated by stoichiometry; X<sub>em</sub>: molar fraction of end-member *em*.

| Sample                           | ID9    |               |        |               | ID14   |               |        |               | ID25a  |               | ID25b  |               |
|----------------------------------|--------|---------------|--------|---------------|--------|---------------|--------|---------------|--------|---------------|--------|---------------|
|                                  | av(23) | $\pm 1\sigma$ | av(51) | $\pm 1\sigma$ | av(31) | $\pm 1\sigma$ | av(16) | $\pm 1\sigma$ | av(29) | $\pm 1\sigma$ | av(20) | $\pm 1\sigma$ |
| SiO <sub>2</sub>                 | 55.43  | 0.648         | 55.39  | 0.387         | 55.91  | 0.425         | 56.12  | 0.524         | 56.19  | 0.300         | 55.29  | 0.289         |
| TiO <sub>2</sub>                 | 0.05   | 0.048         | 0.08   | 0.085         | 0.04   | 0.023         | 0.04   | 0.015         | 0.04   | 0.023         | 0.07   | 0.029         |
| Al <sub>2</sub> O <sub>3</sub>   | 8.72   | 1.097         | 7.89   | 1.429         | 9.43   | 0.304         | 10.07  | 0.379         | 9.81   | 0.537         | 9.14   | 1.071         |
| Cr <sub>2</sub> O <sub>3</sub>   | 0.00   | 0.000         | 0.00   | 0.000         | 0.02   | 0.036         | 0.02   | 0.031         | 0.02   | 0.018         | 0.02   | 0.015         |
| Fe <sub>2</sub> O <sub>3</sub> * | 4.63   | 1.121         | 4.22   | 0.919         | 3.88   | 0.937         | 3.42   | 1.124         | 3.05   | 1.066         | 5.41   | 1.270         |
| FeO                              | 3.07   | 0.677         | 3.51   | 0.901         | 3.23   | 0.778         | 2.79   | 0.867         | 3.56   | 0.550         | 2.33   | 0.562         |
| MnO                              | 0.01   | 0.016         | 0.01   | 0.020         | 0.04   | 0.047         | 0.05   | 0.045         | 0.02   | 0.027         | 0.02   | 0.021         |
| MgO                              | 8.15   | 0.545         | 8.67   | 0.581         | 8.03   | 0.165         | 8.17   | 0.210         | 7.90   | 0.330         | 7.83   | 0.232         |
| CaO                              | 13.06  | 0.980         | 13.88  | 1.078         | 12.62  | 0.254         | 12.92  | 0.346         | 13.05  | 0.527         | 12.78  | 0.375         |
| Na <sub>2</sub> O                | 6.89   | 0.579         | 6.37   | 0.681         | 7.15   | 0.190         | 7.15   | 0.230         | 7.08   | 0.316         | 7.22   | 0.186         |
| K <sub>2</sub> O                 | 0.01   | 0.008         | 0.01   | 0.008         | 0.00   | 0.006         | 0.01   | 0.010         | 0.01   | 0.014         | 0.01   | 0.018         |
| Total                            | 100.02 | 0.537         | 100.03 | 0.369         | 100.35 | 0.585         | 100.77 | 0.660         | 100.73 | 0.388         | 100.10 | 0.502         |
| Si                               | 1.992  | 0.0109        | 1.996  | 0.0095        | 1.996  | 0.0107        | 1.989  | 0.0099        | 1.996  | 0.0058        | 1.983  | 0.0080        |
| Al <sup>IV</sup>                 | 0.008  | 0.0101        | 0.004  | 0.0079        | 0.004  | 0.0077        | 0.011  | 0.0093        | 0.004  | 0.0043        | 0.017  | 0.0080        |
| Al <sup>VI</sup>                 | 0.361  | 0.0517        | 0.331  | 0.0560        | 0.392  | 0.0131        | 0.409  | 0.0160        | 0.407  | 0.0231        | 0.369  | 0.0396        |
| Ti                               | 0.001  | 0.0013        | 0.002  | 0.0023        | 0.001  | 0.0006        | 0.001  | 0.0004        | 0.001  | 0.0006        | 0.002  | 0.0008        |
| Cr                               | 0.000  | 0.0000        | 0.000  | 0.0000        | 0.001  | 0.0010        | 0.001  | 0.0009        | 0.001  | 0.0005        | 0.000  | 0.0004        |
| Fe <sup>3+</sup> *               | 0.125  | 0.0307        | 0.114  | 0.0249        | 0.104  | 0.0250        | 0.091  | 0.0300        | 0.081  | 0.0285        | 0.146  | 0.0346        |
| Fe <sup>2+</sup>                 | 0.092  | 0.0205        | 0.106  | 0.0276        | 0.096  | 0.0234        | 0.083  | 0.0258        | 0.106  | 0.0163        | 0.070  | 0.0169        |
| Mg                               | 0.437  | 0.0313        | 0.466  | 0.0336        | 0.427  | 0.0093        | 0.432  | 0.0110        | 0.419  | 0.0177        | 0.419  | 0.0121        |
| Mn                               | 0.000  | 0.0005        | 0.000  | 0.0006        | 0.001  | 0.0014        | 0.001  | 0.0014        | 0.001  | 0.0008        | 0.001  | 0.0006        |
| Ca                               | 0.503  | 0.0404        | 0.536  | 0.0448        | 0.483  | 0.0104        | 0.491  | 0.0128        | 0.497  | 0.0204        | 0.491  | 0.0141        |
| Na                               | 0.480  | 0.0375        | 0.445  | 0.0449        | 0.494  | 0.0114        | 0.491  | 0.0147        | 0.488  | 0.0213        | 0.502  | 0.0130        |
| K                                | 0.000  | 0.0004        | 0.000  | 0.0004        | 0.000  | 0.0003        | 0.000  | 0.0004        | 0.000  | 0.0006        | 0.000  | 0.0008        |
| $\Sigma$ cations                 | 4.000  |               | 4.000  |               | 4.000  |               | 4.000  |               | 4.000  |               | 4.000  |               |
| $X_{Di}$                         | 0.412  | 0.0429        | 0.435  | 0.0377        | 0.393  | 0.0190        | 0.408  | 0.0213        | 0.395  | 0.0205        | 0.415  | 0.0188        |
| $X_{Hd}$                         | 0.087  | 0.0155        | 0.099  | 0.0236        | 0.088  | 0.0178        | 0.078  | 0.0207        | 0.100  | 0.0127        | 0.069  | 0.0149        |
| $X_{Cen-Cfs}$                    | 0.015  | 0.0102        | 0.019  | 0.0103        | 0.021  | 0.0103        | 0.015  | 0.0118        | 0.015  | 0.0079        | 0.003  | 0.0069        |
| $X_{Ca-Tsch}$                    | 0.003  | 0.0047        | 0.000  | 0.0043        | 0.001  | 0.0040        | 0.005  | 0.0046        | 0.001  | 0.0023        | 0.007  | 0.0039        |
| $X_{Jd}$                         | 0.361  | 0.0510        | 0.331  | 0.0562        | 0.392  | 0.0128        | 0.410  | 0.0156        | 0.408  | 0.0228        | 0.371  | 0.0402        |
| $X_{Acm}$                        | 0.121  | 0.0218        | 0.116  | 0.0214        | 0.104  | 0.0138        | 0.084  | 0.0243        | 0.082  | 0.0249        | 0.136  | 0.0367        |

**Table S2- Omphacite compositions**

av(*n*): average of *n* EMP analyses;  $\sigma$ : standard deviation; \*: calculated by stoichiometry, on the basis of 4 cations for 6 oxygens;  $X_{em}$ : molar fraction of end-member *em* (*Cen*, *Cfs* and *Ca-Tsch* are *clinoenstatite*, *clinoferrrosilite* and *Ca Tschermak*, respectively).
